# Supplementary material for: Large transverse magneto-thermoelectric effect in narrow-band-gap polycrystalline Ag2−δTe
Source: Royal Society of Chemistry journal article supplement (doi:10.1039/d3ta07394g), 2024-01-01
Supplement: d3ta07394g1.pdf [file d3ta07394g1.pdf]

## Supplementary Materials

### Large transverse magneto-thermoelectric effect in narrow-band-gap polycrystalline $\text{Ag}_{2-\delta}\text{Te}$ †

Mingyu Chen,<sup>‡ab</sup> Tao Feng,<sup>‡c</sup> Nan Yin,<sup>d</sup> Quan Shi,<sup>d</sup> Peng Jiang<sup>\*ad</sup> and Xinhe Bao<sup>\*ad</sup>

<sup>a</sup>State Key Laboratory of Catalysis, CAS Center for Excellence in Nanoscience, Dalian Institute of Chemical Physics, Chinese Academy of Sciences, Dalian 116023, Liaoning, China. E-mail: pengjiang@dicp.ac.cn, xhbao@dicp.ac.cn

<sup>b</sup>University of Chinese Academy of Sciences, Beijing 100049, China

<sup>c</sup>Department of Materials Science and Engineering, Southern University of Science and Technology, Shenzhen 518055, Guangdong, China

<sup>d</sup>Dalian National Laboratory for Clean Energy, Dalian Institute of Chemical Physics, Chinese Academy of Sciences, Dalian 116023, Liaoning, China

<sup>‡</sup>These authors contributed equally to the work.

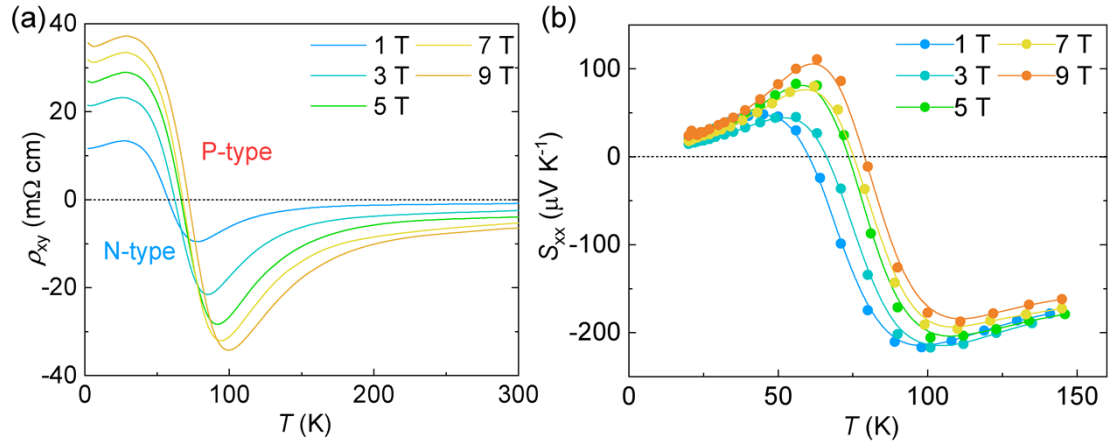

**Fig. S1** The temperature dependent (a) Hall resistivity  $\rho_{xy}$  and (b) Seebeck coefficient  $S_{xx}$  of  $\text{Ag}_{2-\delta}\text{Te}$  under the magnetic field of 1, 3, 5, 7, and 9 T. The N-P transition point shifts towards higher temperatures with the increase of the magnetic field.

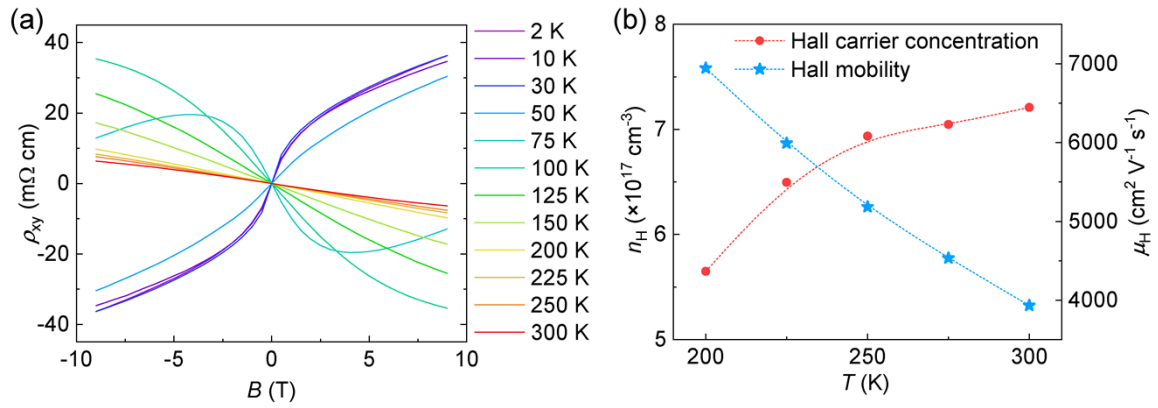

**Fig. S2** (a) The magnetic-field dependent Hall resistivity  $\rho_{xy}$  of  $\text{Ag}_{2-\delta}\text{Te}$  at various temperatures between 2 K and 300 K. (b) The Hall carrier concentration  $n_H$  and Hall mobility  $\mu_H$  of  $\text{Ag}_{2-\delta}\text{Te}$  at 200-300 K calculated based on the almost linear curve of  $\rho_{xy}$  in (a). The linear curves in (a) indicate that the sample is predominantly in a single-carrier model.

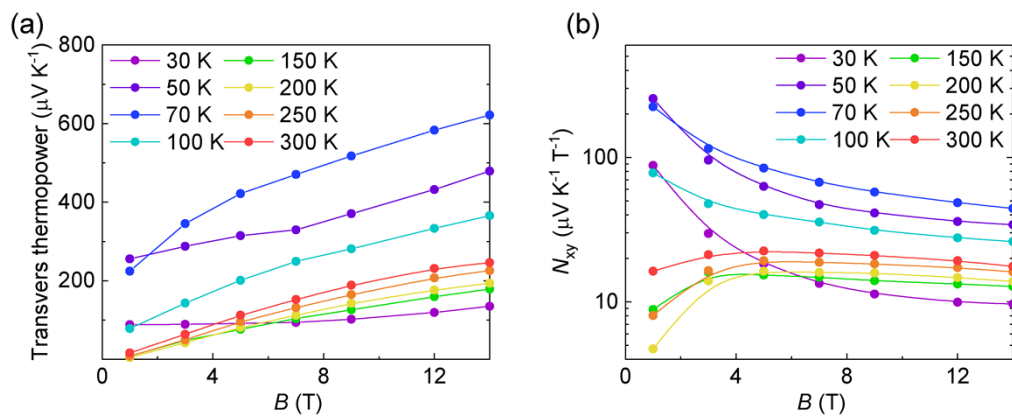

**Fig. S3** The magnetic-field-dependent transverse thermopower (a) and Nernst coefficient  $N_{xy}$  (b) of  $\text{Ag}_{2-6}\text{Te}$  under 1-14 T between 30 K and 300 K. The  $N_{xy}$  values are calculated by the magnetic-field-dependent transverse thermopower using  $N_{xy} = S_{xy}/\mu_0 H$ . The different behaviors on both sides of 100 K reveal the temperature-dependent band structure of  $\text{Ag}_{2-6}\text{Te}$ . It gradually deviates from a linear band structure as the temperature increases.

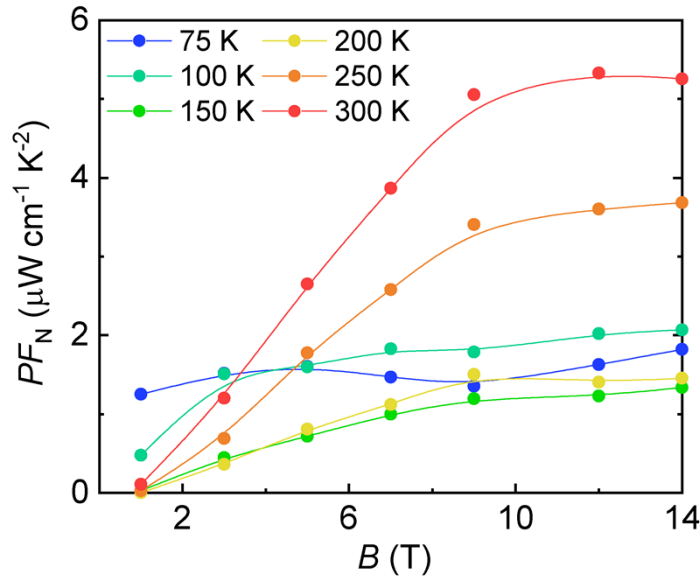

**Fig. S4** The magnetic-field-dependent transverse power factors  $PF_N$  of  $\text{Ag}_{2-6}\text{Te}$  under 1-14 T at various temperatures between 75 and 300 K. It saturates at 3 T below 100 K. As the temperature increases above 100 K, the saturated magnetic field reaches about 7 T.

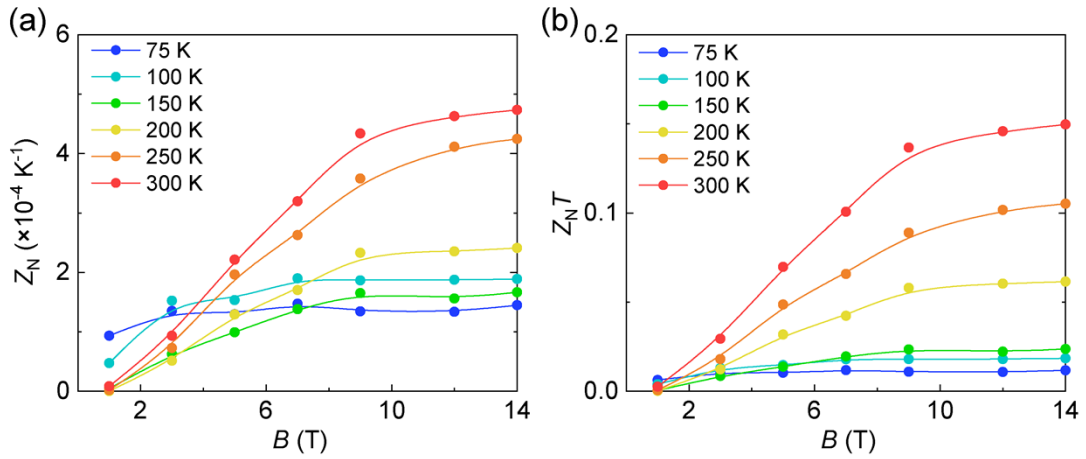

**Fig. S5** Magnetic field dependence of figure of merit  $Z_N$  (a) and  $Z_N T$  (b) in  $\text{Ag}_{2-6}\text{Te}$  under 1-14 T between 75 and 300 K. Both  $Z_N$  and  $Z_N T$  exhibit an initial increase followed by saturation as the magnetic field increases.

**Table S1** The average  $Z_N$  and the corresponding temperature range comparison of partial single-crystal and polycrystalline materials.

|                 | Materials                             | Temperature range (K) | $\Delta T$ (K) | Average $Z_N$ ( $\times 10^{-4} \text{ K}^{-1}$ ) |
|-----------------|---------------------------------------|-----------------------|----------------|---------------------------------------------------|
| Single-crystal  | $\text{WTe}_2^1$                      | 7-16                  | 9              | 193.8                                             |
|                 | $\text{NbSb}_2^2$                     | 5-70                  | 65             | 26.6                                              |
|                 | $\text{PtSn}_4^3$                     | 5-30                  | 25             | 9.4                                               |
|                 | $\text{Bi}_{97}\text{Sb}_3^4$         | 75-300                | 215            | 27.6                                              |
|                 | $\text{Cd}_3\text{As}_2^5$            | 100-350               | 250            | 12.1                                              |
|                 | $\text{ZrTe}_5^6$                     | 80-200                | 120            | 5.1                                               |
| Polycrystalline | $\text{Ag}_2\text{Se}^7$              | 80-300                | 220            | 0.23                                              |
|                 | $\text{NbP}^8$                        | 15-300                | 285            | 0.52                                              |
|                 | $\text{NbP}^9$                        | 30-300                | 270            | 0.58                                              |
|                 | $\text{Bi}_{77}\text{Sb}_{23}^{10}$   | 50-300                | 250            | 2.15                                              |
|                 | $\text{Ag}_{2.6}\text{Te}$ (our work) | 80-300                | 220            | 2.90                                              |
|                 | $\text{NbSb}_2^{11}$                  | 5-100                 | 95             | 9.75                                              |

## References

- 1 Y. Pan, B. He, T. Helm, D. Chen, W. Schnelle and C. Felser, *Nat. Commun.*, 2022, **13**, 3909.
- 2 P. Li, P. F. Qiu, Q. Xu, J. Luo, Y. F. Xiong, J. Xiao, N. Aryal, Q. Li, L. D. Chen and X. Shi, *Nat. Commun.*, 2022, **13**, 7612.
- 3 C. G. Fu, S. N. Guin, T. Scaffidi, Y. Sun, R. Saha, S. J. Watzman, A. K. Srivastava, G. W. Li, W. Schnelle, S. S. P. Parkin, C. Felser and J. Gooth, *Research*, 2020, **2020**, 4643507.
- 4 K. F. Cuff, R. B. Horst, J. L. Weaver, S. R. Hawkins, C. F. Kooi and G. M. Enslow, *Appl. Phys. Lett.*, 1963, **2**, 145-146.
- 5 J. S. Xiang, S. L. Hu, M. Lyu, W. L. Zhu, C. Y. Ma, Z. Y. Chen, F. Steglich, G. F. Chen and P. J. Sun, *Sci. China Phys. Mech.*, 2020, **63**, 237011.
- 6 P. P. Wang, C. W. Cho, F. D. Tang, P. Wang, W. J. Zhang, M. Q. He, G. D. Gu, X. S. Wu, Y. H. Shao and L. Y. Zhang, *Phys. Rev. B*, 2021, **103**, 045203.
- 7 Y. Z. Lei, W. Liu, X. Y. Zhou, J. F. Luo, C. Zhang, X. L. Su, G. J. Tan, Y. G. Yan and X. F. Tang, *J. Solid State Chem.*, 2020, **288**, 121453.
- 8 C. G. Fu, S. N. Guin, S. J. Watzman, G. W. Li, E. K. Liu, N. Kumar, V. Suss, W. Schnelle, G. Auffermann, C. Shekhar, Y. Sun, J. Gooth and C. Felser, *Energy Environ. Sci.*, 2018, **11**, 2813-2820.
- 9 E. F. Scott, K. A. Schlaak, P. Chakraborty, C. G. Fu, S. N. Guin, S. Khodabakhsh, A. E. P. Y. Puente, C. Felser, B. Skinner and S. J. Watzman, *Phys. Rev. B*, 2023, **107**, 115108.
- 10 M. Murata, K. Nagase, K. Aoyama and A. Yamamoto, *Appl. Phys. Lett.*, 2020, **117**, 103903.
- 11 P. Li, P. F. Qiu, J. Xiao, T. T. Deng, L. D. Chen and X. Shi, *Energy Environ. Sci.*, 2023, **16**, 3753-3759.
